# Supplementary material
Source: PubMed Central journal article supplement (PMC374352)

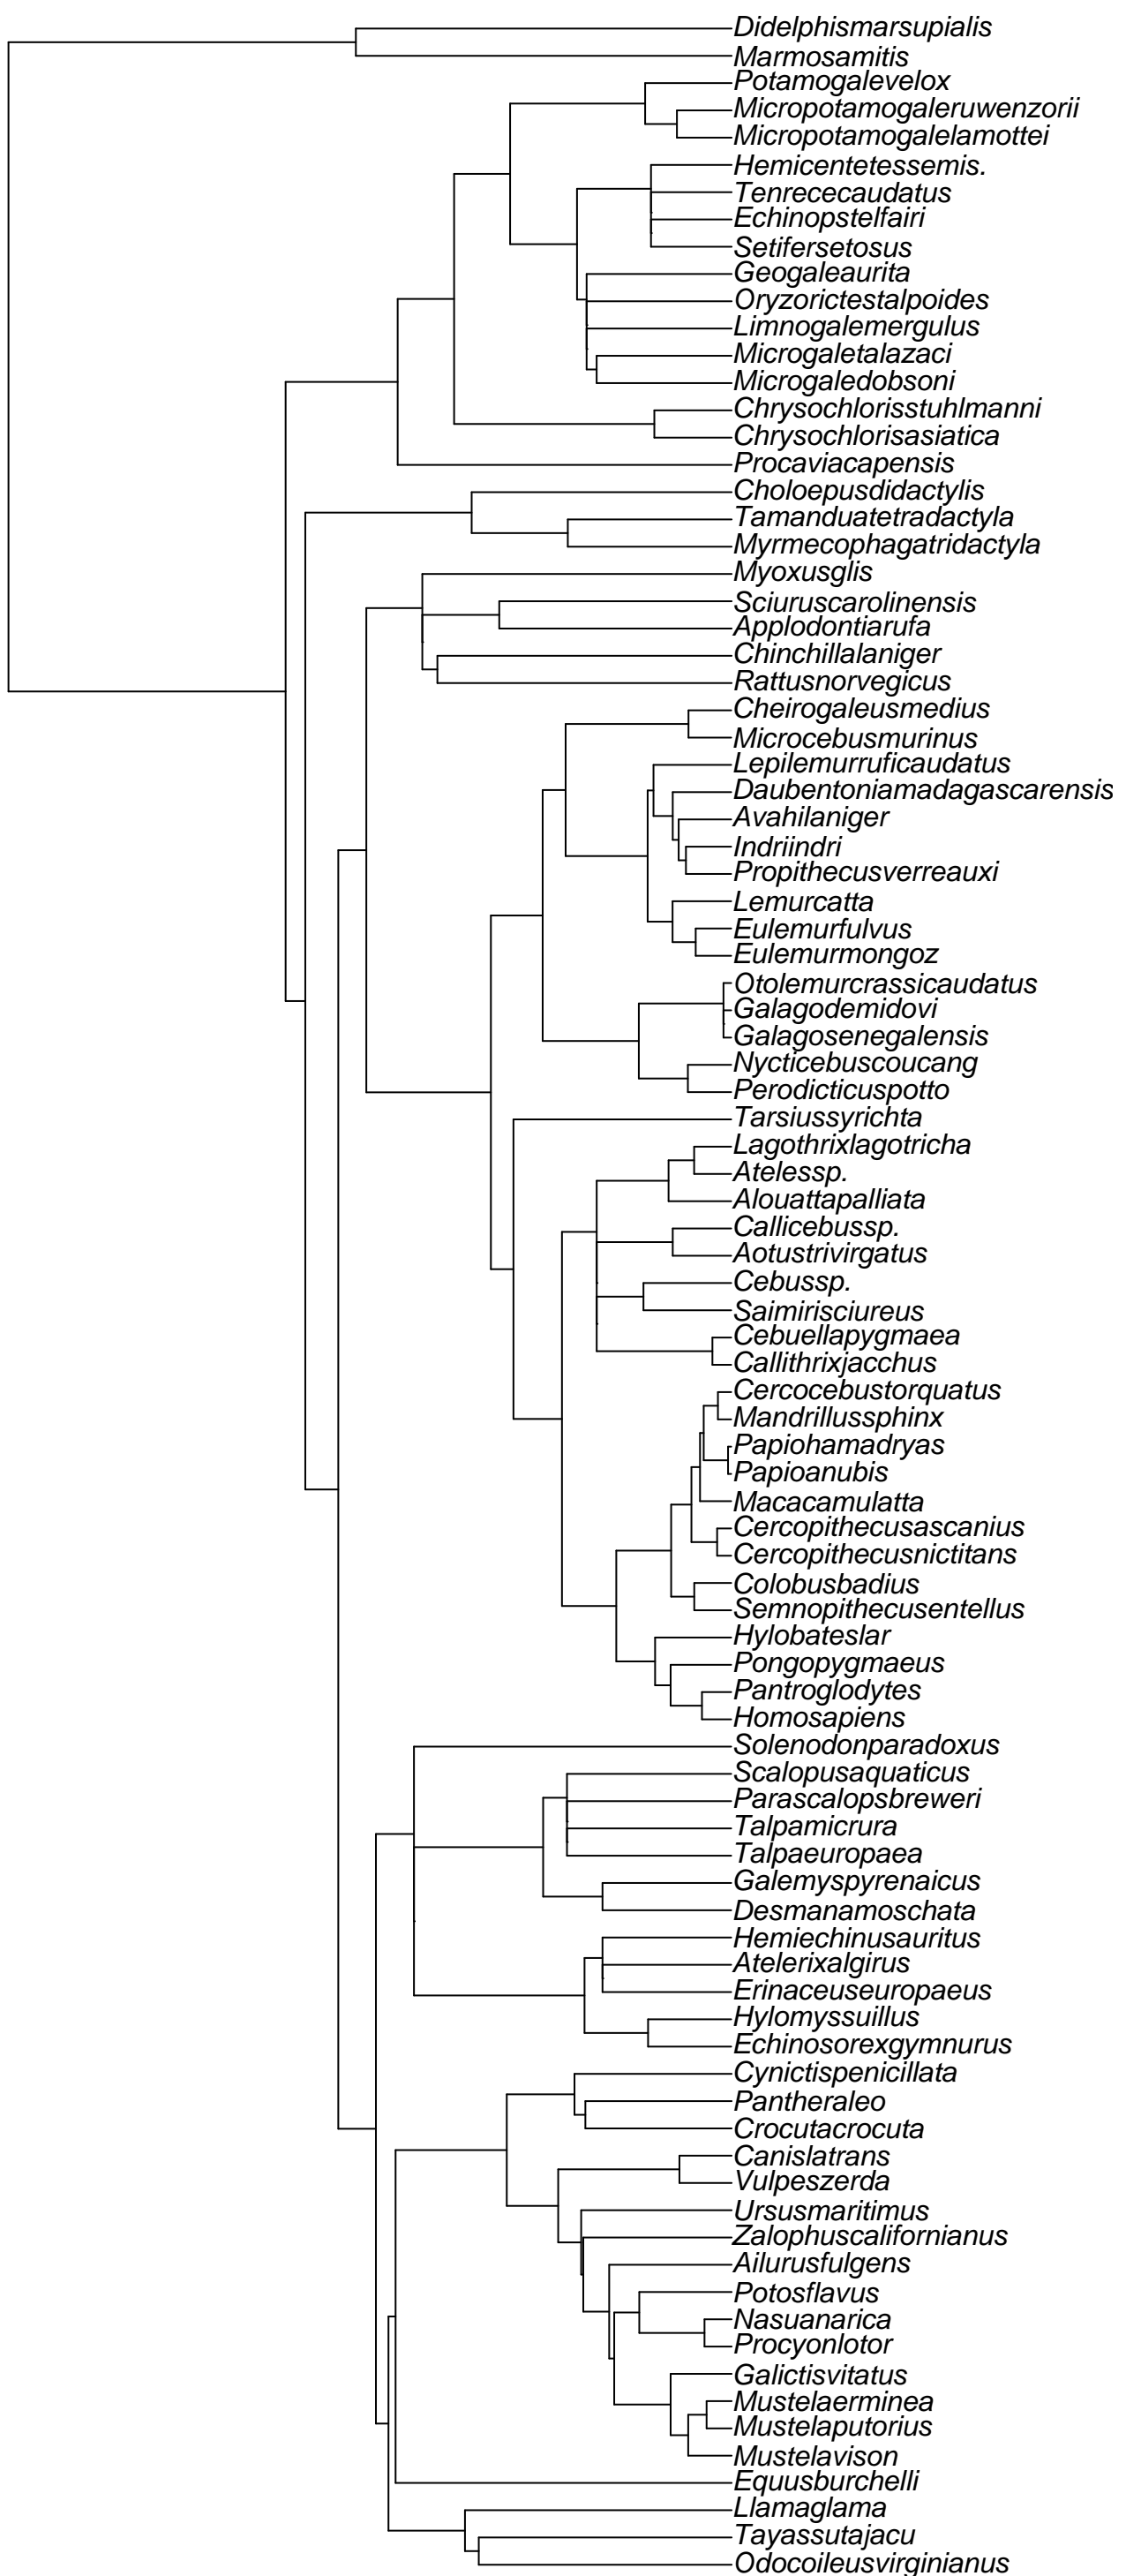

Supplement: pnas_101_11_3962__7.pdf [file pnas_101_11_3962__7.pdf]
